# Supplementary material for: Synthesis, characterization and reactivity of new complexes of titanium and zirconium containing a potential tridentate amidinato-cyclopentadienyl ligand
Source: Royal Society of Chemistry journal article supplement (doi:10.1039/b709923a), 2007-01-01
Supplement: b709923a.pdf [file b709923a.pdf]

**Supporting Information for:**

---

**Synthesis, characterization and reactivity of new complexes of Titanium and Zirconium containing a potential tridentate amidinato-cyclopentadienyl ligand.**

Valerio Bertolasi<sup>a</sup>, Rita Boaretto<sup>b,\*</sup>, Michele R. Chierotti<sup>c</sup>, Roberto Gobetto<sup>c</sup> and Silvana Sostero<sup>b</sup>

<sup>a</sup> Centro di Strutturistica Diffraattometrica, Dipartimento di Chimica, Università di Ferrara, Via Borsari 46, 44100 Ferrara, Italy. Fax: +39-532-240709; Tel: +39 0532 455131; E-mail: [valerio.bertolasi@unife.it](mailto:valerio.bertolasi@unife.it)

<sup>b</sup> Dipartimento di Chimica, Università di Ferrara, Via Borsari 46, 44100 Ferrara, Italy. Fax: +39-532-240709; Tel: +39 0532 455755; E-mail: [rita.boaretto@unife.it](mailto:rita.boaretto@unife.it)

<sup>c</sup> Dipartimento di Chimica IFM, Università di Torino, Via P. Giuria 7, 101256 Torino, Italy. Fax: +39 011 6707855; Tel: +39 011 6707523; E-mail: [roberto.gobetto@unito.it](mailto:roberto.gobetto@unito.it)

Electronic Supplementary Information (ESI) available: ORTEP views of compounds **2b** (**Fig.5a**, **Fig.5b**), **2c** (**Fig.6**) and **2d** (**Fig.7**). Crystallographic data in CIF format and [checkCIF.pdf](#)

Captions for ORTEP views of compounds **2b** (**Fig.5a**, **Fig.5b**), **2c** (**Fig.6**) and **2d** (**Fig.7**).

**Fig.5a.** ORTEP diagram of the compound **2b** (molecule **1**). The thermal ellipsoids are drawn at the 40% probability level.

**Fig.5b.** ORTEP diagram of the compound **2b** (molecule **2**). The thermal ellipsoids are drawn at the 40% probability level.

**Fig.6.** ORTEP diagram of the compound **2c**. The thermal ellipsoids are drawn at the 40% probability level.

**Fig.7.** ORTEP diagram of the compound **2d**. The thermal ellipsoids are drawn at the 40% probability level.

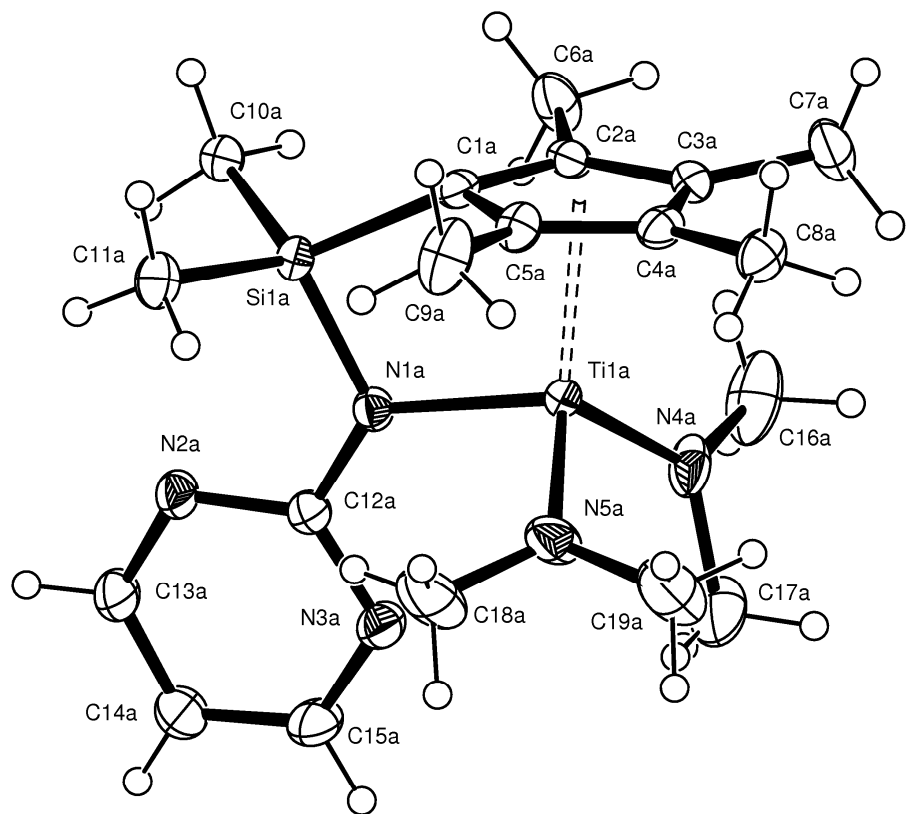

Fig 5a

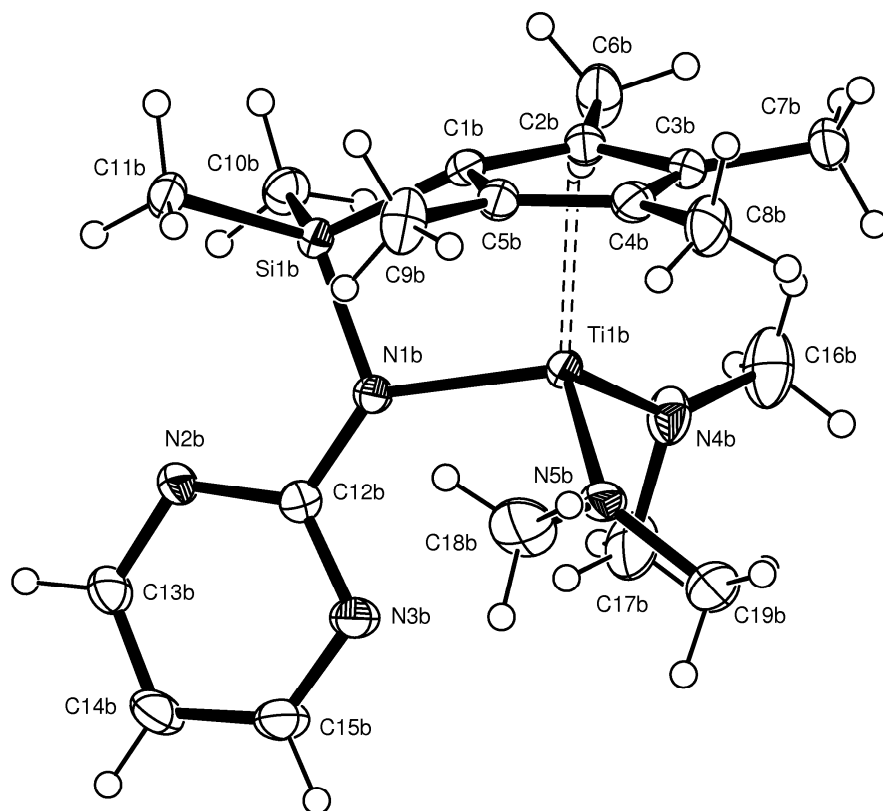

Fig 5b

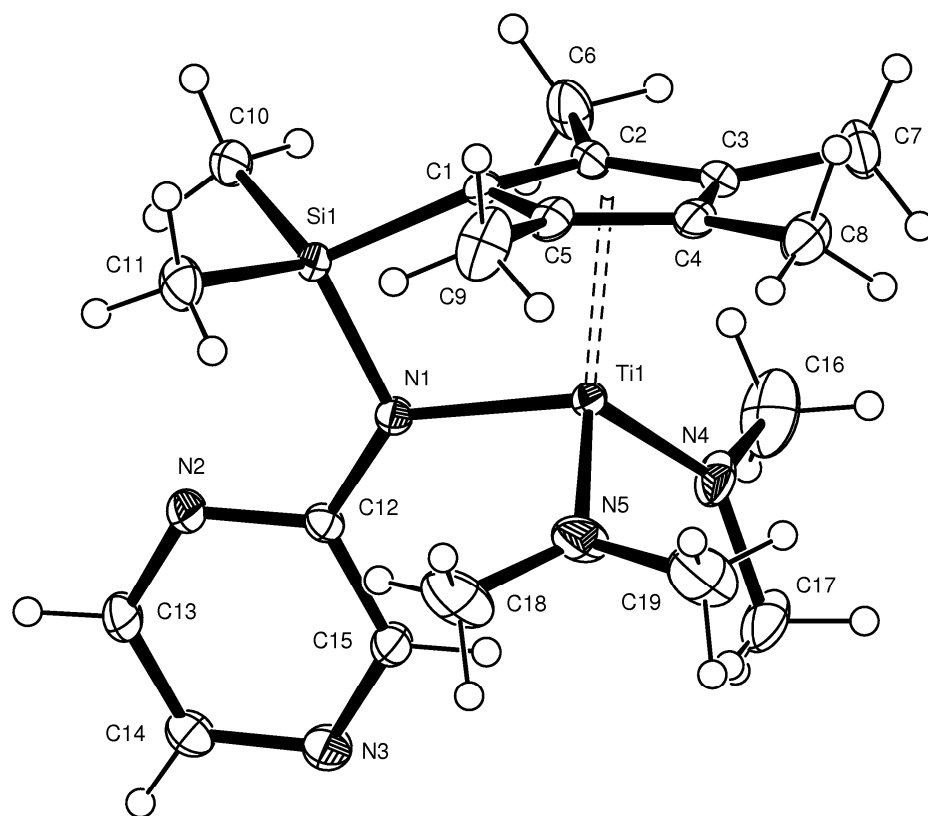

Fig 6

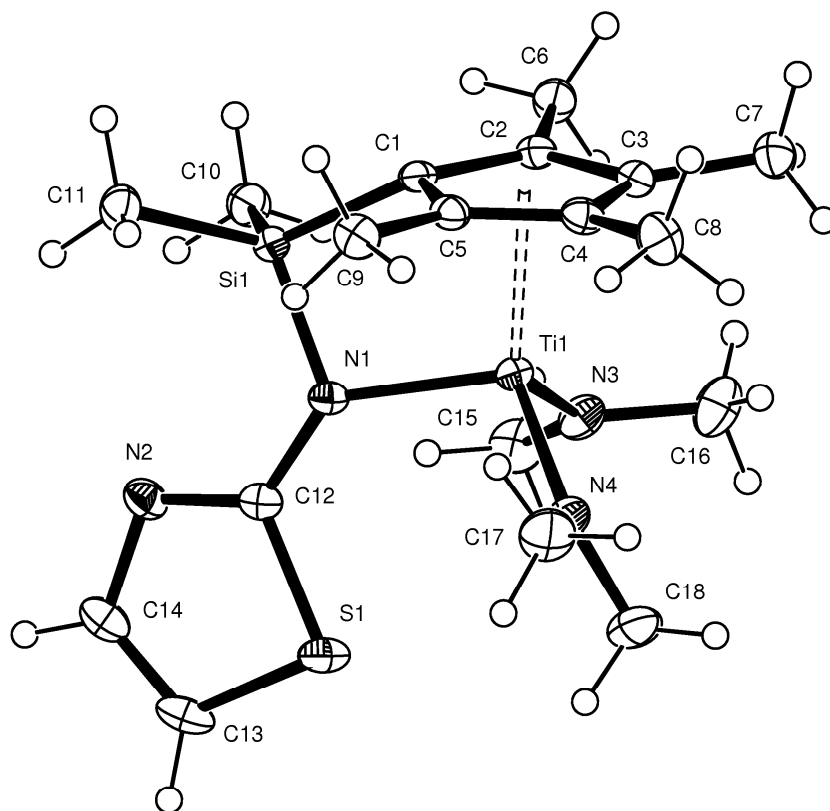

Fig 7
